# Supplementary material for: Quantification of variation and the impact of biomass in targeted 16S rRNA gene sequencing studies
Source: PubMed Central journal article supplement (PMC6131952; doi:10.1186/s40168-018-0543-z), 2018-09-10

a.

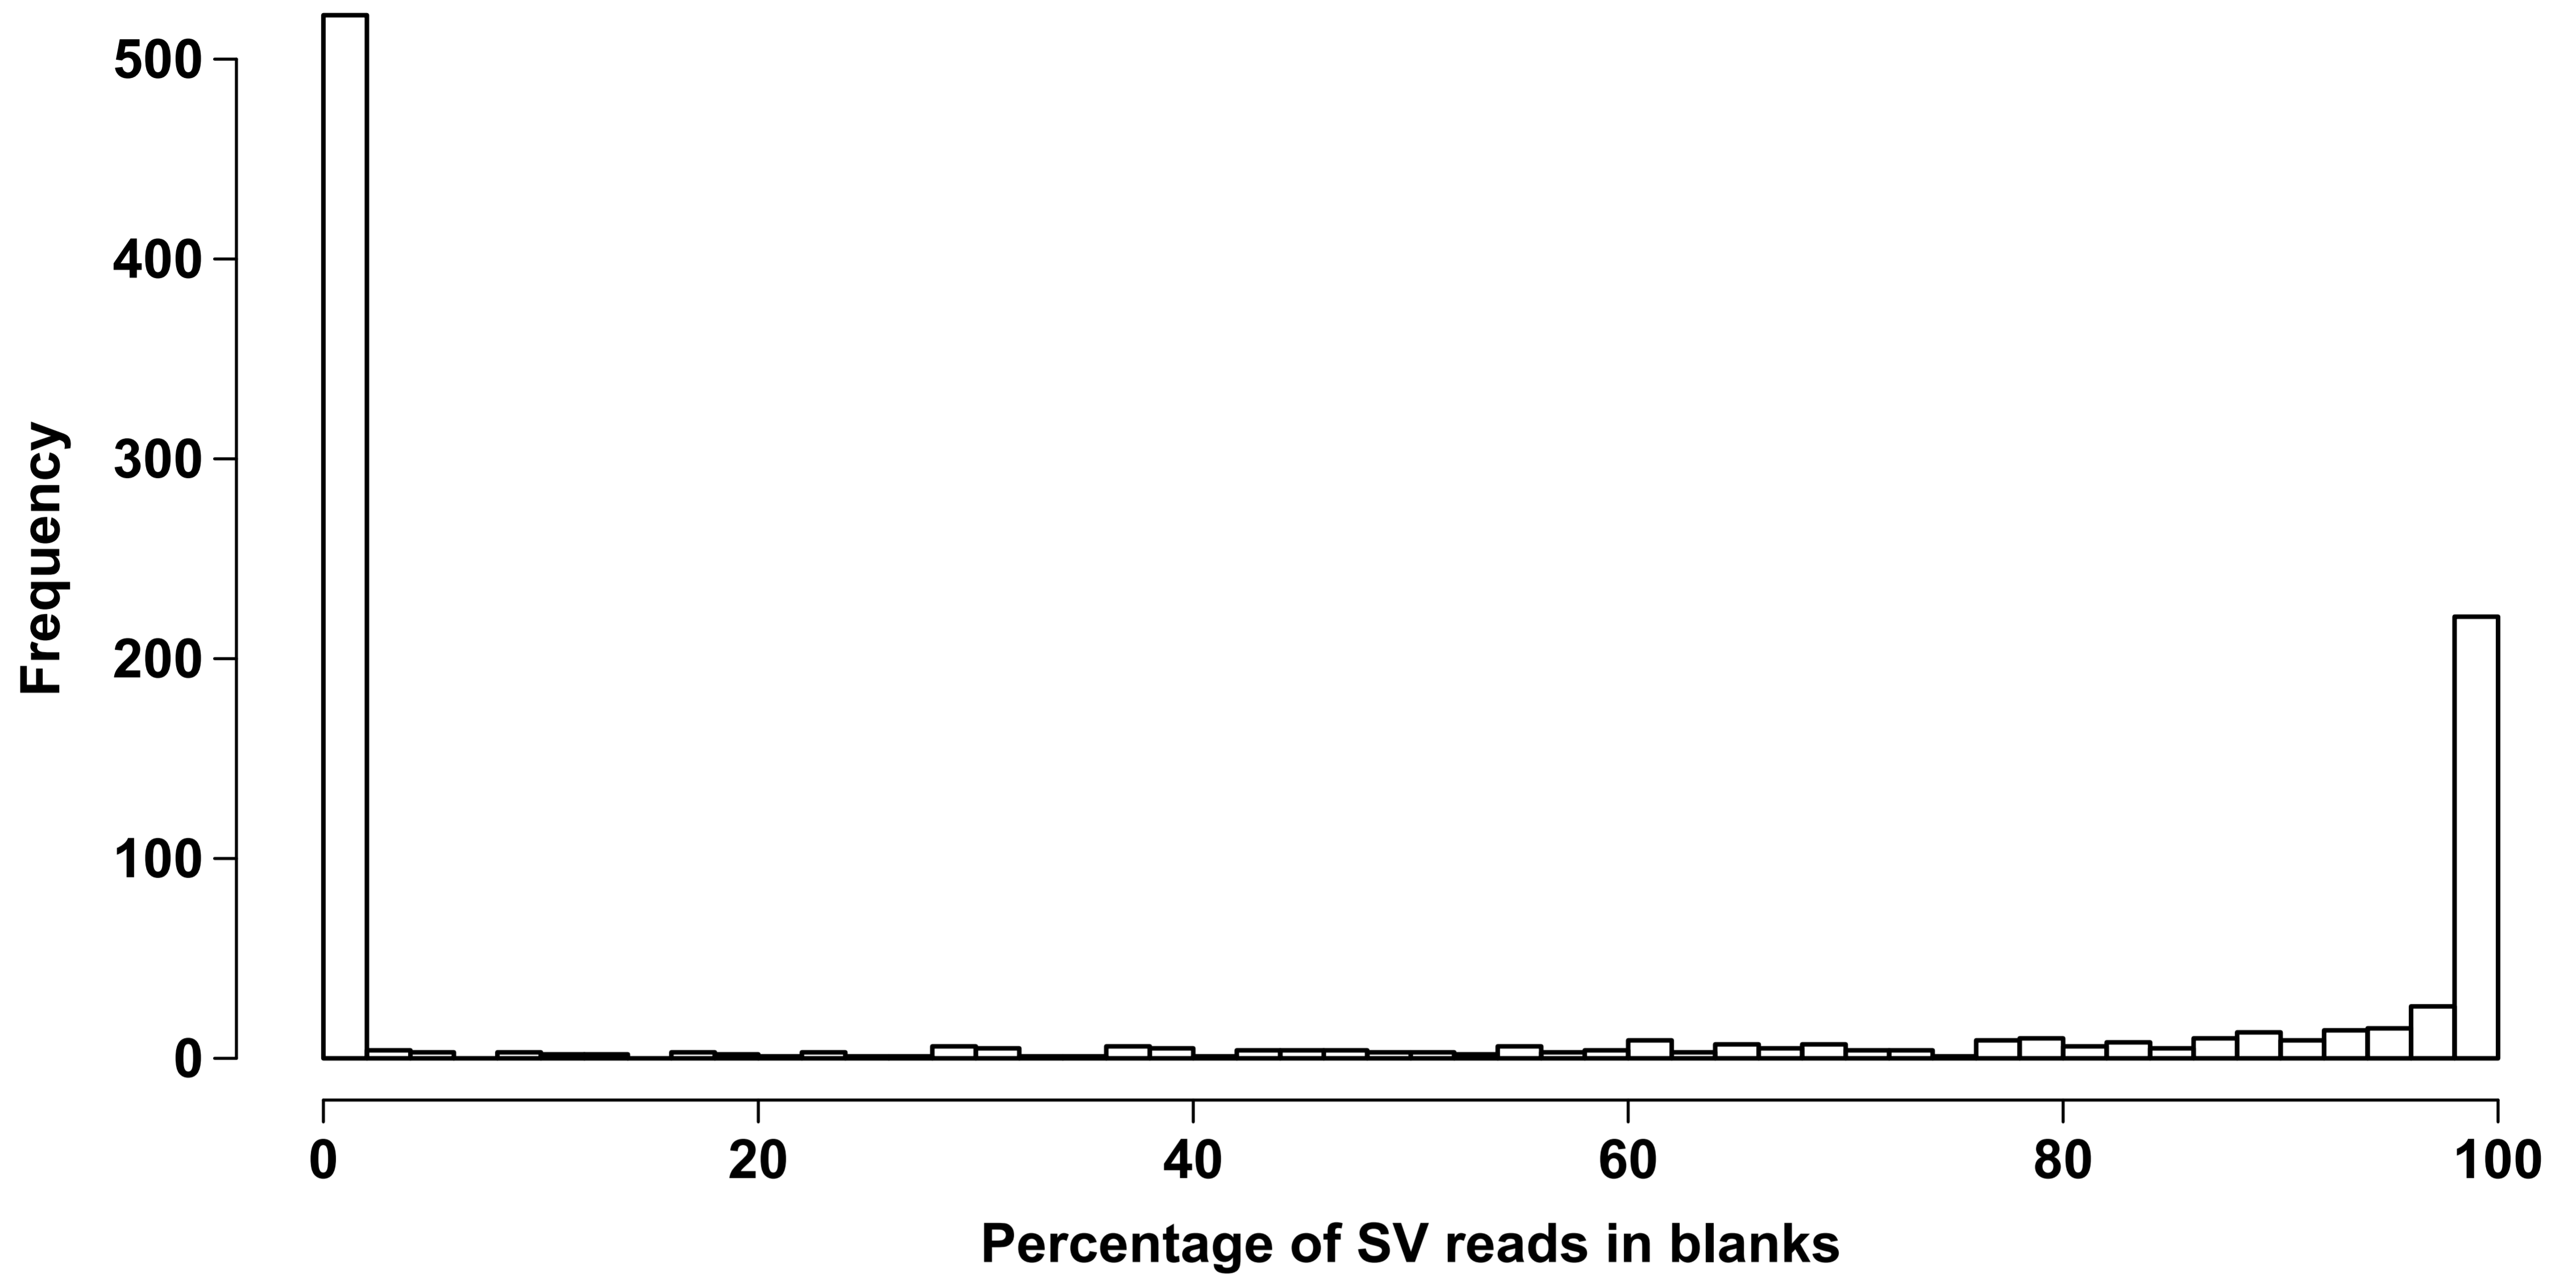

b.

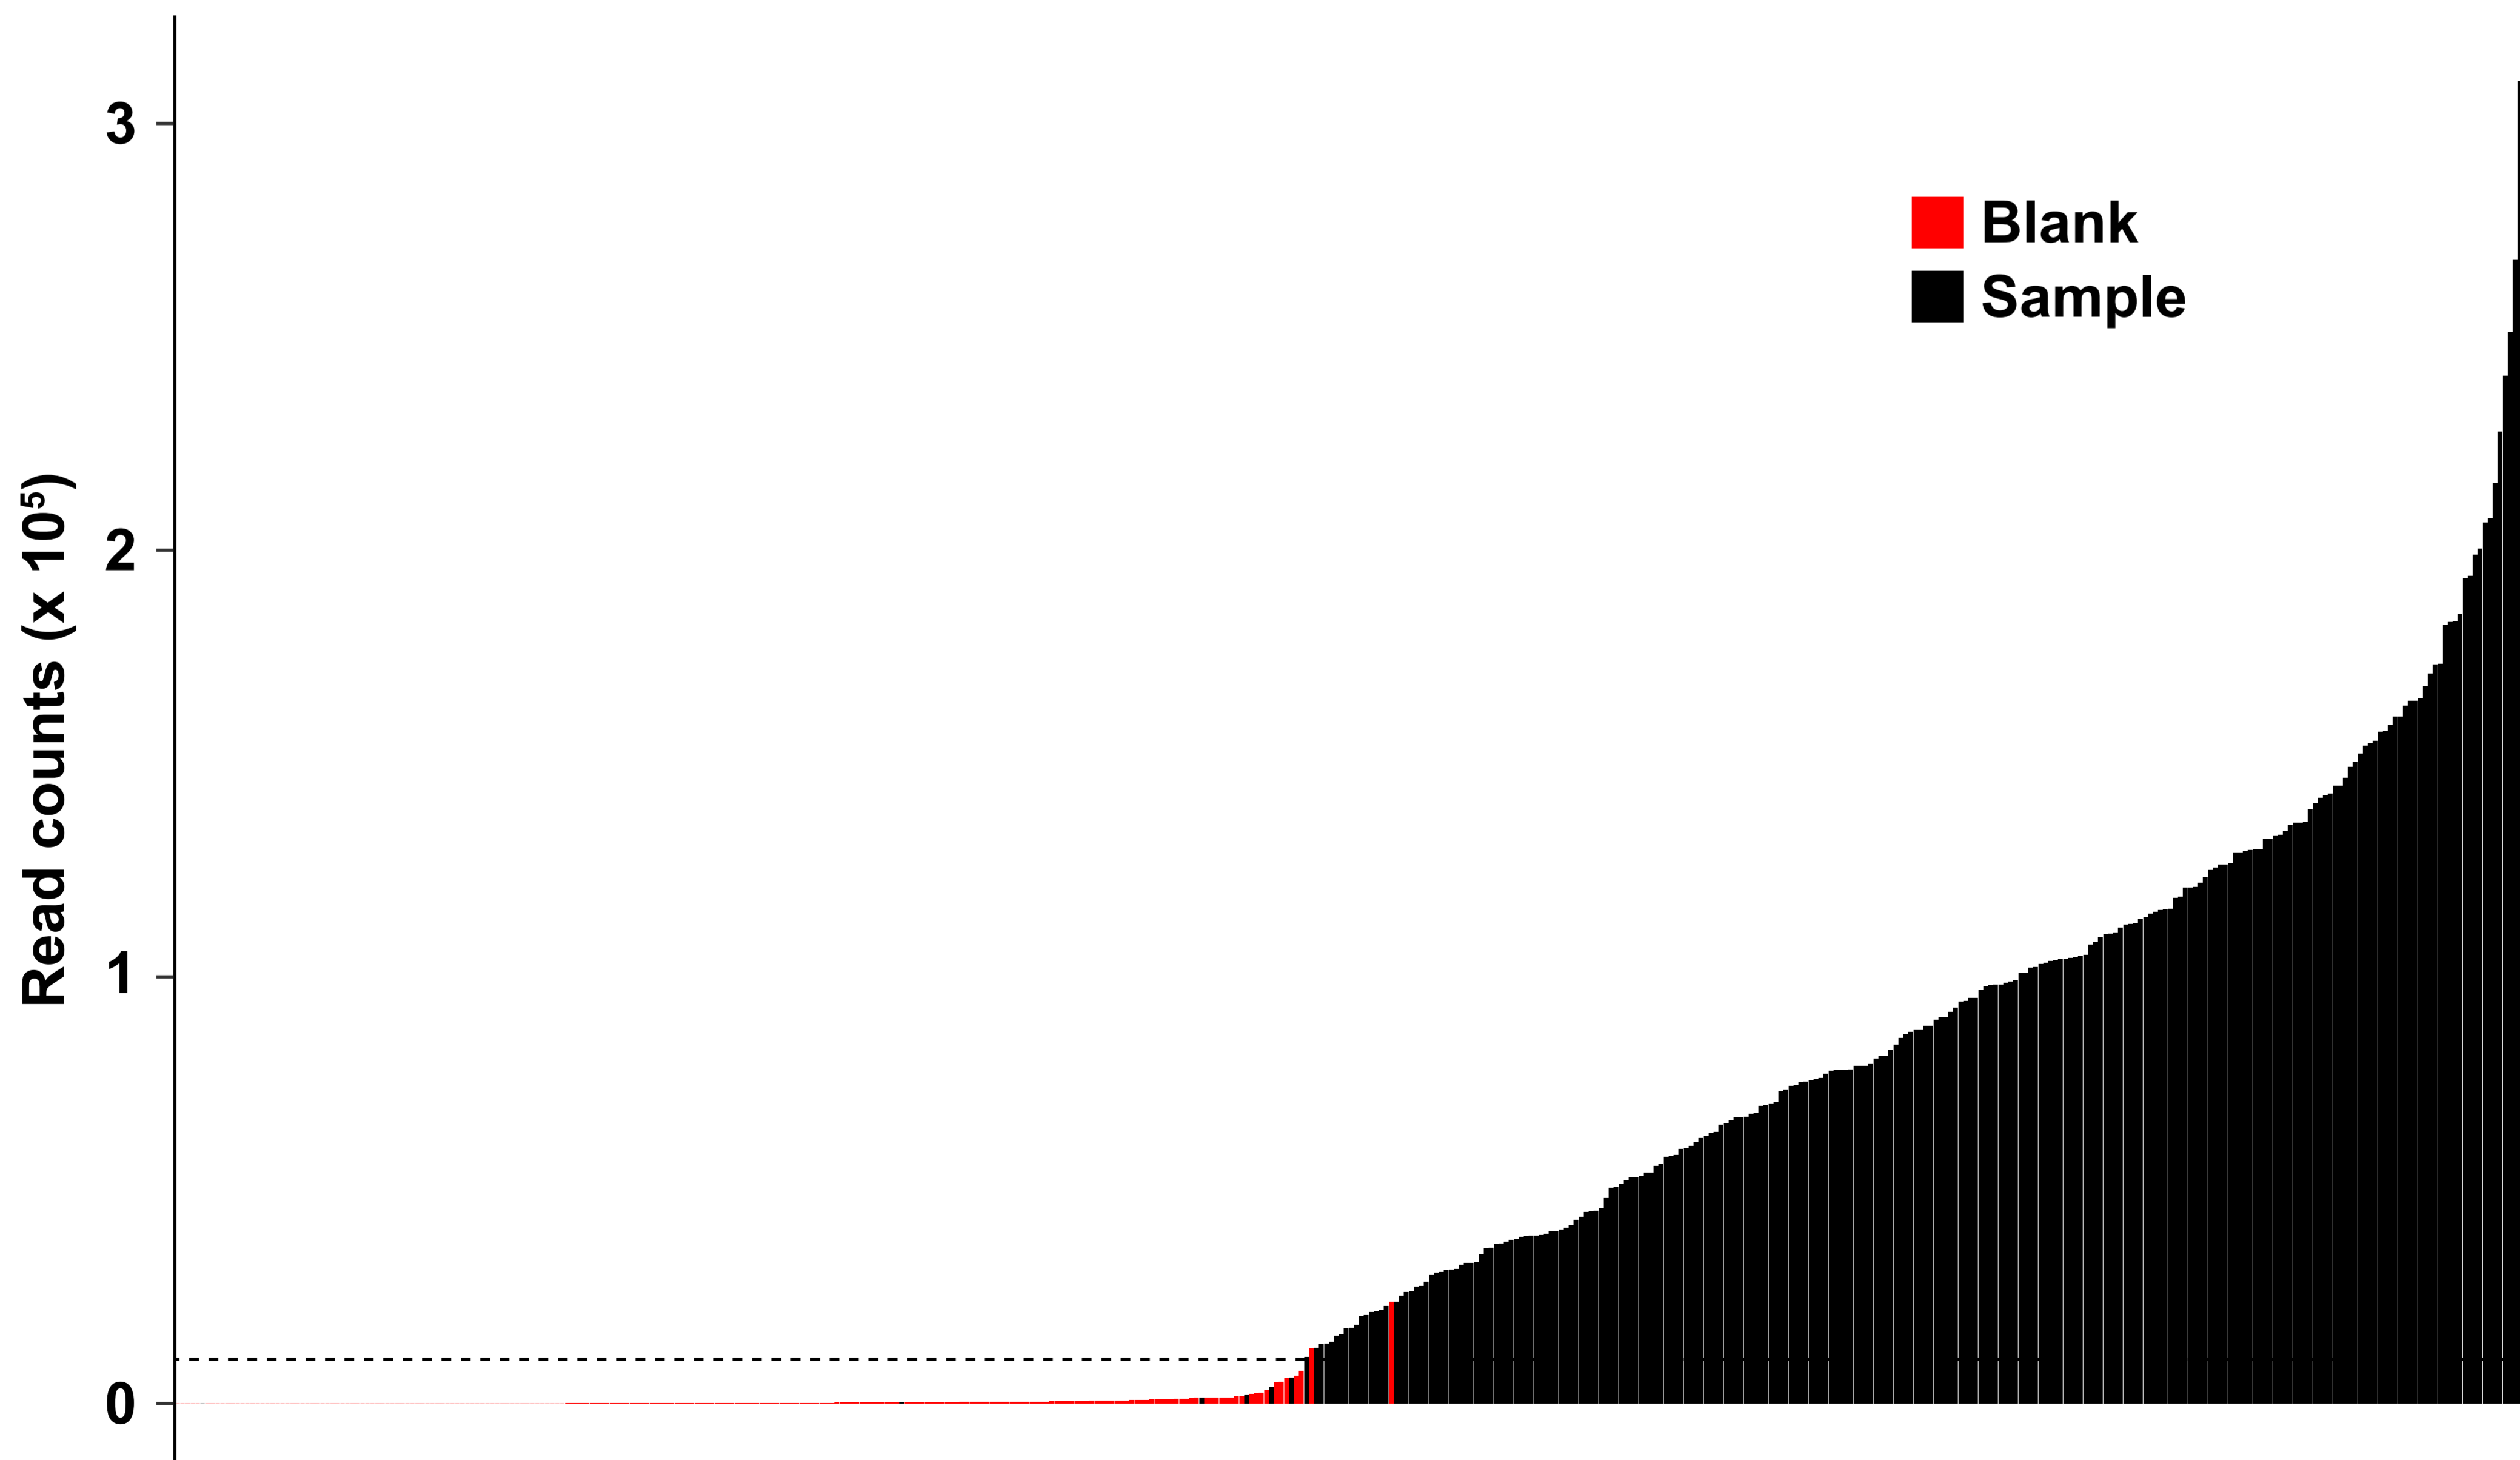

Supplement: 40168_2018_543_MOESM2_ESM.pdf [file 40168_2018_543_MOESM2_ESM.pdf]
